# Supplementary material for: Urban Dust Microbiome: Impact on Later Atopy and Wheezing
Source: Environ Health Perspect. 2016 May 27;124(12):1919–23. doi: 10.1289/EHP158 (PMC5132631; doi:10.1289/EHP158)
Supplement: (142 KB) PDF [file EHP158.s001.acco.pdf]

**Note to readers with disabilities:** *EHP* strives to ensure that all journal content is accessible to all readers. However, some figures and Supplemental Material published in *EHP* articles may not conform to [508 standards](#) due to the complexity of the information being presented. If you need assistance accessing journal content, please contact [ehp508@niehs.nih.gov](mailto:ehp508@niehs.nih.gov). Our staff will work with you to assess and meet your accessibility needs within 3 working days.

## **Supplemental Material**

### **Urban Dust Microbiome: Impact on Later Atopy and Wheezing**

Christina Tischer, Fabian Weikl, Alexander J. Probst, Marie Standl, Joachim Heinrich, and Karin Pritsch

#### **Table of Contents**

**Table S1:** Adjusted\* odds ratios (aORs 95% CI) for the association between fungal and bacterial diversity (Simpson index, tertiles) and early wheezing (up to 2 years of age)

**Table S1:** Adjusted\* odds ratios (aORs 95% CI) for the association between fungal and bacterial diversity (Simpson index, tertiles) and early wheezing (up to 2 years of age)

| <b>Logistic regression models</b>                  | <b>Fungal diversity</b>  | <b>Bacterial diversity</b> |
|----------------------------------------------------|--------------------------|----------------------------|
| <b>Wheezing ever (2y)</b>                          |                          |                            |
| 2 <sup>nd</sup> tertile vs 1 <sup>st</sup> tertile | 0.58 (0.27, 1.23)        | 0.75 (0.35, 1.62)          |
| 3 <sup>rd</sup> tertile vs 1 <sup>st</sup> tertile | <b>0.36 (0.16, 0.83)</b> | 0.97 (0.45, 2.08)          |
| <b>GEE model (longitudinal analysis)</b>           |                          |                            |
| <b>Wheezing until 2y</b>                           |                          |                            |
| 2 <sup>nd</sup> tertile vs 1 <sup>st</sup> tertile | 0.56 (0.29, 1.06)        | 0.61 (0.30, 1.21)          |
| 3 <sup>rd</sup> tertile vs 1 <sup>st</sup> tertile | <b>0.40 (0.18, 0.89)</b> | 1.11 (0.57, 2.15)          |

\*adjusted for sex, maternal education, season of dust sampling
